# Supplementary material for: Topographic and Bioclimatic Determinants of the Occurrence of Forest and Grassland in Tropical Montane Forest-Grassland Mosaics of the Western Ghats, India
Source: PubMed Central journal article supplement (PMC4488301; doi:10.1371/journal.pone.0130566), 2015-06-29

**Appendix S1: Stacked barplots showing the regional identity and community type of data points falling in each of the terminal nodes of the classification tree in Figure 3**

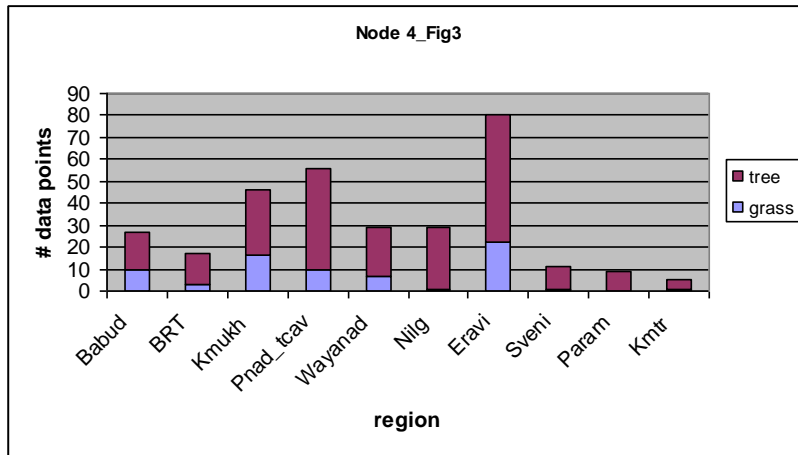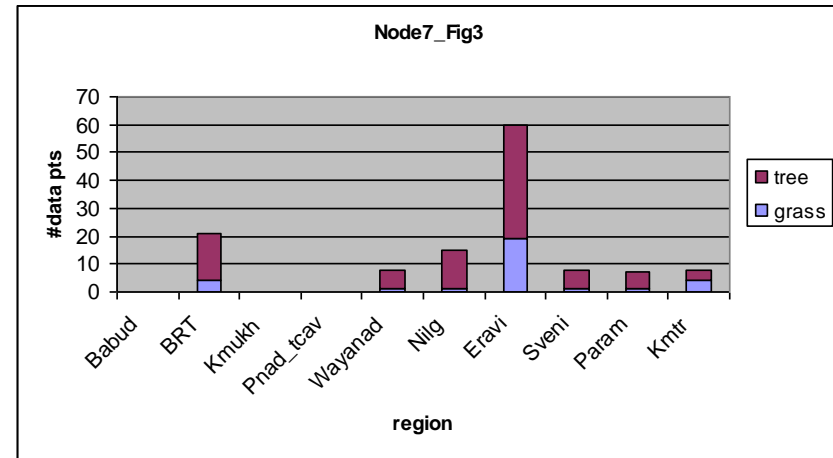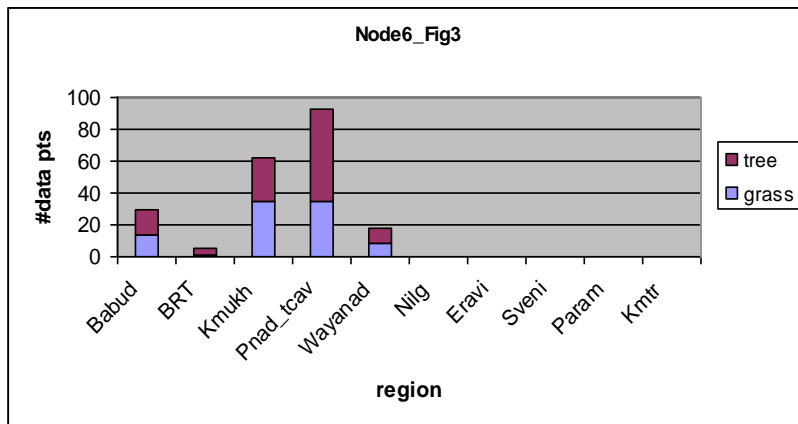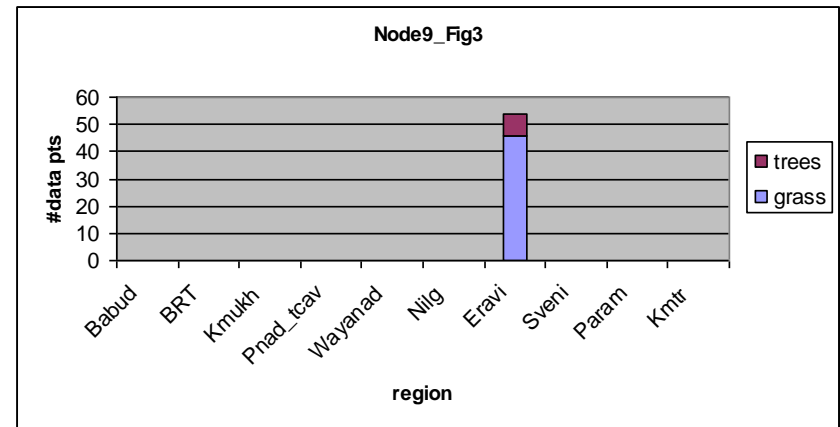

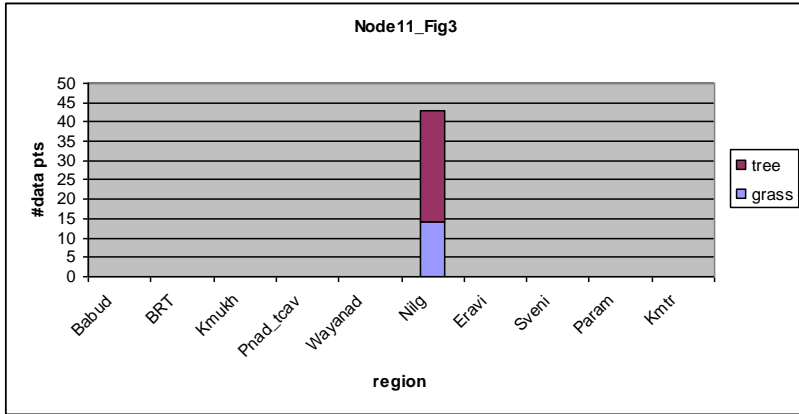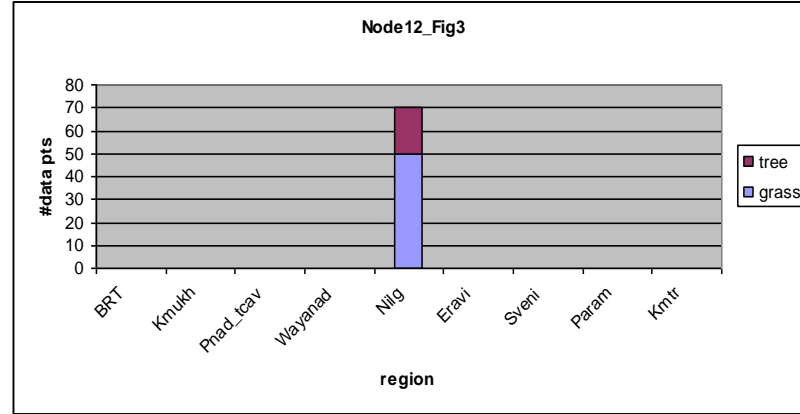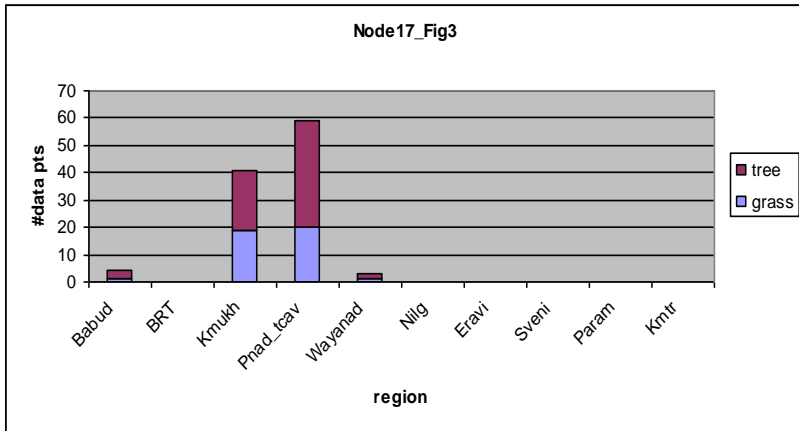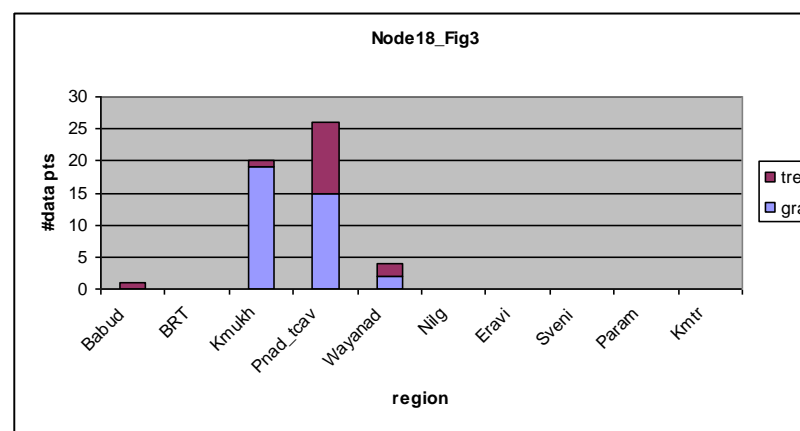

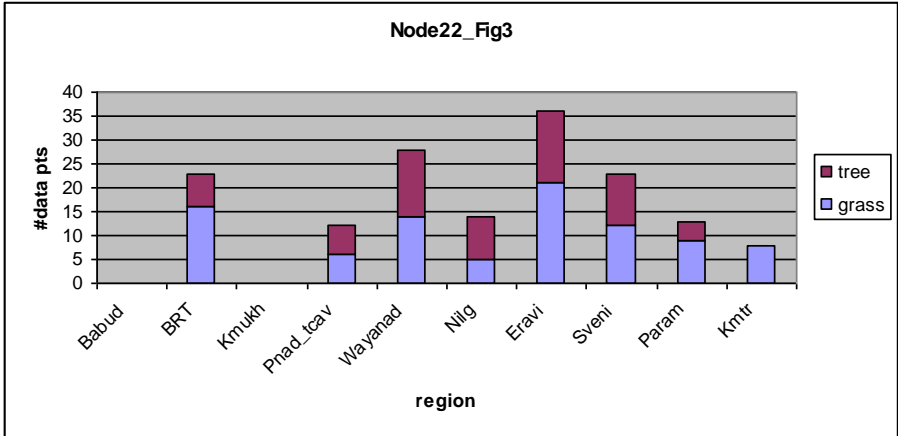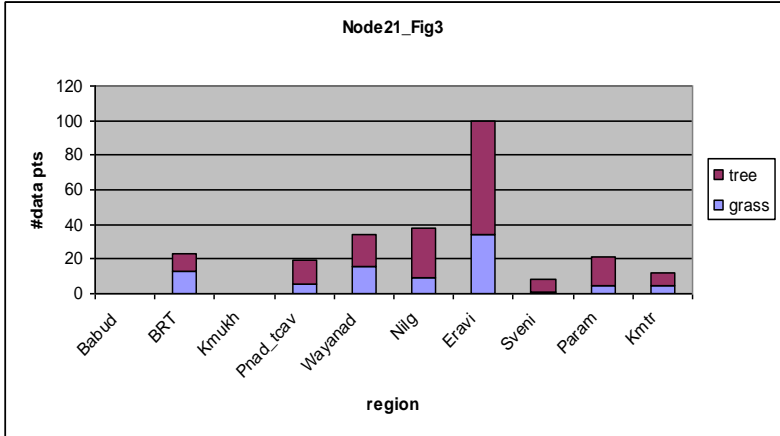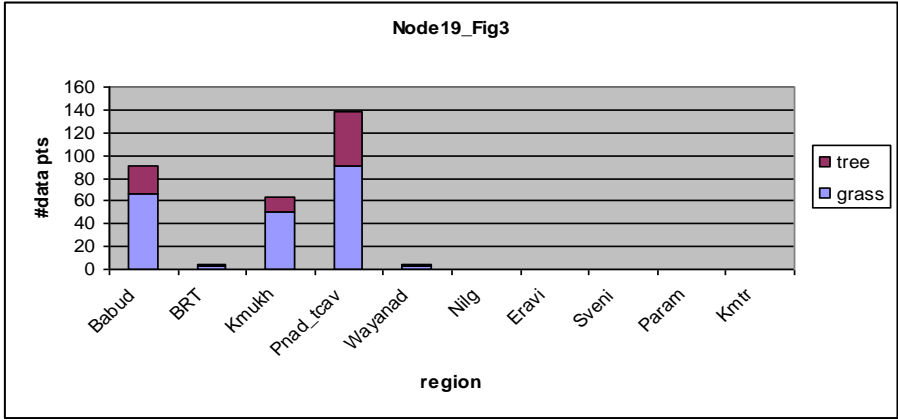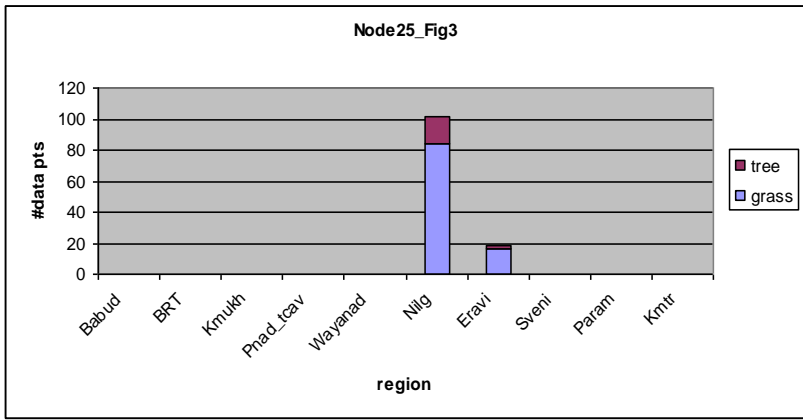

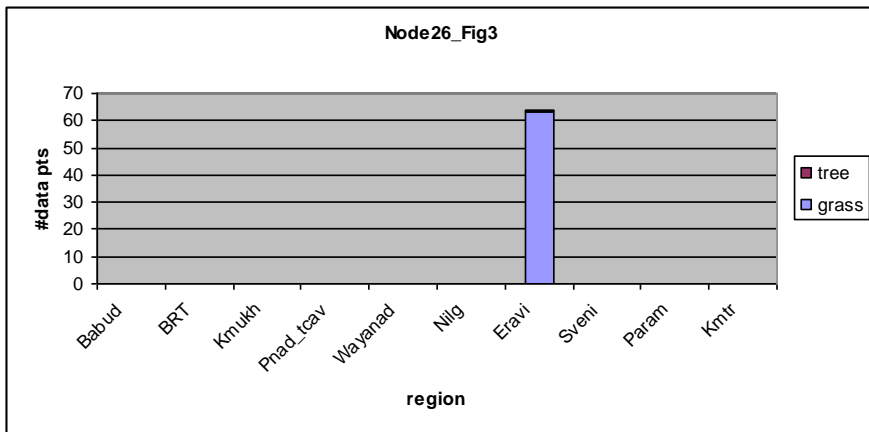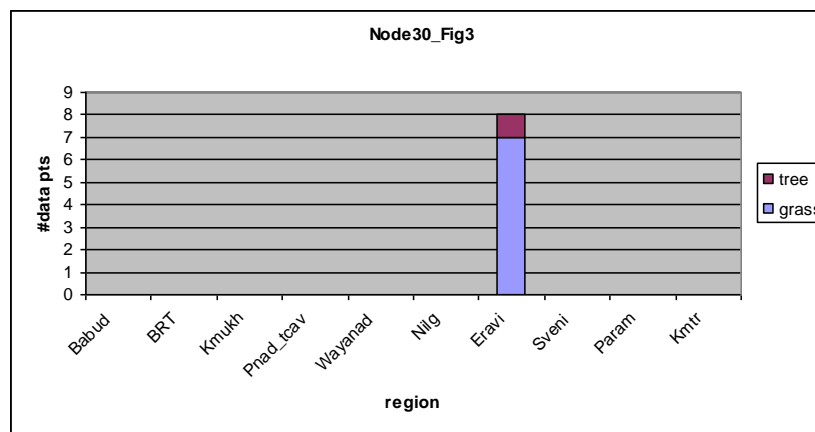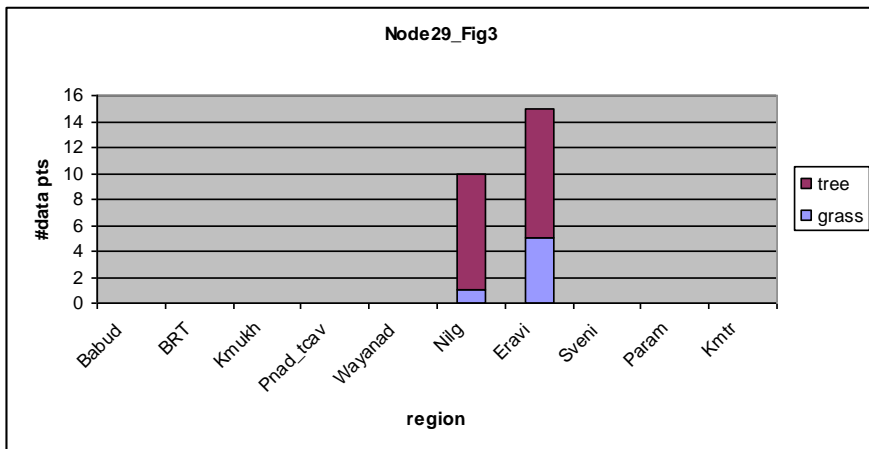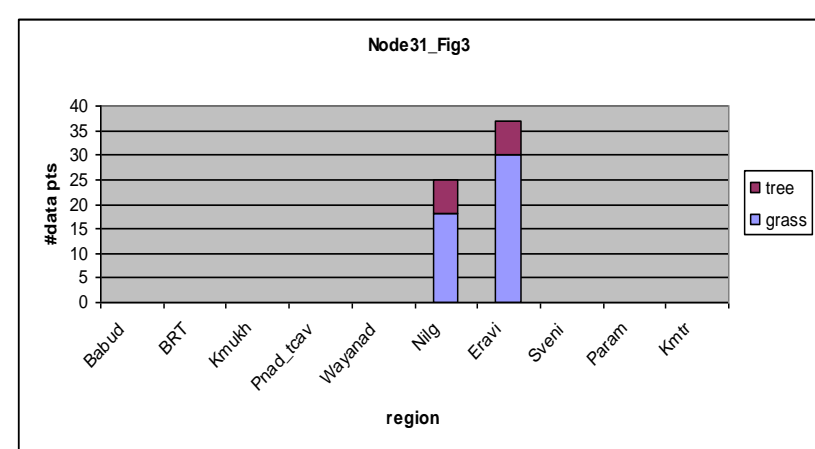

Supplement: pone.0130566.s001.pdf [file pone.0130566.s001.pdf]
